# Supplementary material for: Identifying barriers and facilitators to palliative care integration in the management of hospitalized patients with COVID-19: A qualitative study
Source: PubMed Central journal article supplement — Palliat Med. 2022 Apr 20;36(6):945–54. doi: 10.1177/02692163221087162 (PMC9174575; doi:10.1177/02692163221087162), 2022-04-20
Supplement: sj-pdf-1-pmj-10.1177_02692163221087162.pdf [file sj-pdf-1-pmj-10.1177_02692163221087162.pdf]

# Appendix 1

## Interview Guide

### Clinical background

- 1) Can you please describe your clinical role prior to the COVID pandemic?
- 2) Can you please describe your experience in providing palliative care prior to the COVID pandemic?
- 3) **FOR Non-Palliative Clinicians:** Can you please describe your experience working with palliative care specialists or teams prior to the COVID pandemic?

### Practice during the pandemic

- 1) How did your practice change during the COVID pandemic?
  - a. *Clinical load changes?*
  - b. *Patient population?*
  - c. *Did you change your usual care model in any way? Staffing? Virtual Strategies?*
- 2) Can you describe your experience in providing care during the COVID pandemic?
  - a. How has this affected you and your team personally?
  - b. *Reflecting on your practice during the COVID pandemic, has this been a negative, mixed, neutral or positive experience and why? Job satisfaction?*

### COVID team/care

- 1) Could you please describe your clinical role in managing patients with active COVID infections?
  - a. *Setting? Ie. ICU, Ward, COVID Unit, LTC, Community, etc.*
- 2) Who was part of your/the clinical team managing patients with active COVID infections in your institution?
  - a. *Other clinicians/HCPs ?*
  - b. *Other teams or specialists?*
  - c. *Palliative care specialists or teams*

### Integration of palliative care and palliative care teams

- 1) How were palliative care specialists or teams involved in the care of your patients with COVID?
  - a. *As integrated team members, ad hoc basis, by referral, etc.*
- 2) **FOR Non-Palliative Clinicians:** Reflecting on all of your patients with COVID, for those that did have a palliative care specialist or team involved; can you explain why palliative care was involved?
  - a. *What was their role?*
  - b. *What were the facilitators to involving palliative care?*

## Appendix 1

- 3) **FOR Non-Palliative Clinicians:** Reflecting on all of your patients with COVID, for those that did not have a palliative care specialist or team involved; can you explain why they were not involved?
  - a. *What were the barriers to involving palliative care?*
- 4) **FOR Palliative Clinicians:** Can you describe your experience in providing palliative care during the COVID pandemic?
  - a. *Did you change your usual care model in any way?*
- 5) **FOR Palliative Clinicians:** Can you describe your experience in providing palliative care to patients with COVID?
- 6) **FOR Palliative Clinicians:** Can you explain why palliative care was involved in the care of patient with COVID in your institution?
  - a. *What was the role of the team?*
  - b. *What were the facilitators to involving palliative care?*
- 7) **FOR Palliative Clinicians:** Can you explain why palliative care was not involved in the management of patients with COVID in your institution?
  - a. *What were the barriers to involving palliative care?*
- 8) What would help to better integrate palliative care into the management of patients with COVID in the future?
